# Supplementary material
Source: publisher site journal article supplement (https://www.spandidos-publications.com/2917/downloadSupplementary)

Figure S1. Identification of RASMCs via the specific marker  $\alpha$ -SMA. Scale bar, 20  $\mu$ m. RASMCs, rat aorta smooth muscle cells;  $\alpha$ -SMA, alpha-smooth muscle actin.

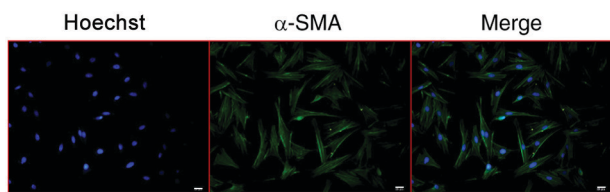

Supplement: Supplementary file 1 [file downloadSupplementary]
